# Supplementary material for: Chemical Changes in the Broccoli Volatilome Depending on the Tissue Treatment
Source: MDPI journal article supplement (doi:10.3390/molecules27020500), 2022-01-14
Supplement: s1 [file s1]

# Chemical changes in the broccoli volatilome depending on the tissue treatment

M.N. Wiczorek, P.M. Pieczywek, J. Cybulska, A. Zdunek, H. H. Jeleń

**Table S1.** metabolites identified in fresh and frozen – thawed florets of broccoli using SPME-GC×GC-ToFMS

| Metabolite                                               | #  | fresh<br>broccoli<br>peak area | RSD [%] | frozen-thawed<br>broccoli<br>peak area | RSD [%] |
|----------------------------------------------------------|----|--------------------------------|---------|----------------------------------------|---------|
| (7a-Isopropenyl-4,5-dimethyloctahydroinden-4-yl)methanol | 1  | 76 310                         | 29,06   | 134 717                                | 24,44   |
| (Z)-3-Heptene                                            | 2  | 403 152                        | 8,10    | 0                                      | 0,00    |
| 1-(2,4-Dimethyl-furan-3-yl)-ethanone                     | 3  | 46 390                         | 0,00    | 82 075                                 | 20,14   |
| 1-(Methylthio)-2-methylbut-2-ene                         | 4  | 2 010 906                      | 83,04   | 0                                      | 0,00    |
| 1,2,4-Trithiolane                                        | 5  | 18 613                         | 29,82   | 41 832                                 | 61,11   |
| 1,2-Benzenedicarboxylic acid, butyl 2-ethylhexyl ester   | 6  | 200 276                        | 56,16   | 372 349                                | 101,40  |
| 1,2-Ethanediol, monoformate                              | 7  | 317 678                        | 100,54  | 638 664                                | 47,60   |
| 1,3,5-Cycloheptatriene                                   | 8  | 3 696 551                      | 12,57   | 16 255 953                             | 1,54    |
| 1,3,7-Octatriene                                         | 9  | 220 105                        | 7,62    | 0                                      | 0,00    |
| 1,3-Benzodioxol-2-one, hexahydro-, trans-                | 10 | 1 058 207                      | 7,43    | 1 656 909                              | 23,71   |
| 1,3-Cyclobutanediol, 2,2,4,4-tetramethyl-                | 11 | 0                              | 0,00    | 42 750                                 | 21,77   |
| 1,3-Cyclopentanediol, 4-methyl-                          | 12 | 88 276                         | 43,00   | 391 083                                | 0,00    |
| 1,3-Dioxolane, 2-(6-octynyl)-                            | 13 | 40 388                         | 32,08   | 47 040                                 | 50,92   |
| 1,3-Hexadiene, 3-ethyl-2-methyl-                         | 14 | 178 190                        | 57,06   | 383 705                                | 85,41   |
| 1,3-Hexadiene,c&t                                        | 15 | 0                              | 0,00    | 158 322                                | 47,28   |
| 1,3-Octadiene                                            | 16 | 93 749                         | 31,81   | 55 015                                 | 33,89   |
| 1,3-Pentadiene                                           | 17 | 10 448 424                     | 12,82   | 9 251 152                              | 21,92   |
| 1,3-Propanediol, 2,2-dimethyl-, dinitrate                | 18 | 511 883                        | 18,57   | 1 671 734                              | 18,18   |
| 1,5-Heptadiene, 3,4-dimethyl-                            | 19 | 3 875 616                      | 59,74   | 232 293                                | 35,25   |
| 1,5-Hexadien-3-ol                                        | 20 | 1 061 513                      | 20,79   | 0                                      | 0,00    |
| 1,5-Hexadiene, 2,5-dipropyl-                             | 21 | 66 432                         | 42,36   | 21 218                                 | 5,53    |
| 1,5-Pentanediol, 3-methyl-                               | 22 | 316 863                        | 40,02   | 110 899                                | 35,27   |
| 1,6-Dioxaspiro[4.4]nonane, 2-ethyl-                      | 23 | 1 863 727                      | 43,50   | 35 929                                 | 42,12   |
| 1,6-Dioxaspiro[4.5]decane, 2-ethyl-, (2R-trans)-         | 24 | 84 148                         | 25,25   | 36 273                                 | 17,40   |
| 1,6-Octadien-3-ol, 3,7-dimethyl-, 2-aminobenzoate        | 25 | 66 037                         | 26,82   | 29 892                                 | 7,83    |
| 1,6-Octadiene, 5,7-dimethyl-, (R)-                       | 26 | 22 215                         | 10,41   | 70 793                                 | 29,16   |
| 1,7-Nonadiene, 4,8-dimethyl-                             | 27 | 752 307                        | 79,70   | 321 125                                | 0,00    |
| 1,7-Octadiene, 2,3,3-trimethyl-                          | 28 | 0                              | 0,00    | 160 730                                | 23,86   |
| 11-Tricosene                                             | 29 | 6 912 078                      | 33,10   | 10 941 857                             | 0,00    |
| 1-Butanamine, 3-methyl-                                  | 30 | 337 622                        | 17,96   | 431 898                                | 86,78   |
| 1-Butanol                                                | 31 | 102 300                        | 62,14   | 116 578                                | 99,95   |
| 1-Butanol, 3-methyl-                                     | 32 | 1 612 757                      | 24,00   | 0                                      | 0,00    |
| 1-Butene                                                 | 33 | 144 121                        | 0,00    | 187 961                                | 25,57   |
| 1-Butene, 2-methyl-4-[(3-methyl-2-butenyl)oxy]-          | 34 | 0                              | 0,00    | 146 088                                | 36,98   |
| 1-Butene, 3-methyl-                                      | 35 | 6 265 091                      | 8,96    | 2 026 782                              | 58,79   |
| 1-Butene, 4-isothiocyanato-                              | 36 | 97 567 276                     | 33,85   | 13 035 140                             | 44,71   |
| 1-Cyclohexene-1-acetaldehyde, 2,6,6-trimethyl-           | 37 | 37 037                         | 78,97   | 42 064                                 | 19,49   |
| 1-Cyclohexene-1-carboxaldehyde, 2,6,6-trimethyl-         | 38 | 309 128                        | 44,98   | 582 996                                | 63,95   |
| 1-Decene                                                 | 39 | 257 028                        | 46,82   | 3 826 698                              | 51,01   |
| 1-Dodecene                                               | 40 | 351 427                        | 26,12   | 974 411                                | 23,52   |
| 1-Ethyl-1,4-cyclohexadiene                               | 41 | 1 156 324                      | 48,10   | 143 703                                | 47,25   |
| 1-Hexanol                                                | 42 | 213 269 259                    | 13,74   | 81 421 227                             | 0,00    |
| 1-Hexanol, 2,2-dimethyl-                                 | 43 | 2 510 920                      | 8,35    | 1 227 060                              | 0,00    |
| 1-Hexene, 2,5-dimethyl-                                  | 44 | 138 096                        | 5,68    | 221 994                                | 0,00    |

|                                                  |    |             |       |             |        |
|--------------------------------------------------|----|-------------|-------|-------------|--------|
| 1-Hexene, 3,5,5-trimethyl-                       | 45 | 868 458     | 9,46  | 471 925     | 28,05  |
| 1-Hexene, 4-methyl-                              | 46 | 152 307     | 0,00  | 75 350      | 28,78  |
| 1-Hexene, 6-bromo-                               | 47 | 213 578     | 38,13 | 245 036     | 32,20  |
| 1H-Indene, 1-ethylidene-                         | 48 | 16 889      | 28,23 | 35 824      | 50,06  |
| 1H-Indole, 1-methoxy-                            | 49 | 54 578      | 91,43 | 64 337      | 41,03  |
| 1H-Pyrrole, 2,5-dihydro-                         | 50 | 124 594     | 17,50 | 0           | 0,00   |
| 1H-Tetrazole-1,5-diamine                         | 51 | 0           | 0,00  | 341 234     | 62,02  |
| 1-Iodo-2-methylundecane                          | 52 | 211 191     | 0,00  | 125 739     | 97,51  |
| 1-Methoxy-2,2,3-trimethylaziridine (sin)         | 53 | 925 516     | 0,00  | 271 461     | 110,34 |
| 1-Methylcycloheptanol                            | 54 | 179 970     | 41,85 | 617 039     | 70,37  |
| 1-Nonadecanol                                    | 55 | 143 622     | 13,38 | 70 848      | 0,00   |
| 1-Nonen-3-ol                                     | 56 | 0           | 0,00  | 4 104 686   | 117,70 |
| 1-Nonene                                         | 57 | 1 010 861   | 54,05 | 188 296     | 16,92  |
| 1-Octanol, 2-butyl-                              | 58 | 3 951 795   | 29,66 | 3 024 826   | 5,49   |
| 1-Octen-3-one                                    | 59 | 129 970     | 59,70 | 657 101     | 45,98  |
| 1-Octyn-3-ol, 4-ethyl-                           | 60 | 0           | 0,00  | 210 477     | 92,35  |
| 1-Pentanamine                                    | 61 | 20 684 801  | 62,13 | 0           | 0,00   |
| 1-Pentanethiol                                   | 62 | 69 895      | 60,44 | 0           | 0,00   |
| 1-Pentanol                                       | 63 | 2 549 622   | 21,91 | 1 959 187   | 52,69  |
| 1-Penten-3-ol                                    | 64 | 104 982 782 | 2,16  | 140 224 084 | 8,28   |
| 1-Penten-3-one                                   | 65 | 7 092 830   | 16,12 | 164 701 225 | 13,68  |
| 1-Pentene, 3-ethyl-3-methyl-                     | 66 | 0           | 0,00  | 140 876     | 39,26  |
| 1-Pentene, 4-methyl-                             | 67 | 37 899      | 12,54 | 281 756     | 35,55  |
| 1-Pentene, 5-nitro-                              | 68 | 569 152     | 2,81  | 998 918     | 15,03  |
| 1-Propanol                                       | 69 | 501 357     | 21,25 | 0           | 0,00   |
| 1-Propene, 1-(methylthio)-, (E)-                 | 70 | 151 394     | 4,15  | 0           | 0,00   |
| 1-Propene, 1-(methylthio)-, (E)-                 | 71 | 48 676      | 21,43 | 0           | 0,00   |
| 2-(1-Cyclohexenyl)ethylamine                     | 72 | 40 727      | 0,00  | 26 762      | 54,56  |
| 2(3H)-Furanone, 5-ethyldihydro-                  | 73 | 100 970     | 61,43 | 89 965      | 53,80  |
| 2(5H)-Furanone, 5-ethyl-                         | 74 | 982 518     | 15,63 | 7 448 787   | 24,09  |
| 2,2-Dimethylpropionic acid, dodecyl ester        | 75 | 10 304      | 12,30 | 16 590      | 0,00   |
| 2,3-Butanedione                                  | 76 | 2 314 645   | 68,22 | 2 793 641   | 116,96 |
| 2,3-Diazabicyclo[2.2.1]-hept-2-ene               | 77 | 1 032 536   | 25,23 | 0           | 0,00   |
| 2,3-Dihydrofuran                                 | 78 | 0           | 0,00  | 645 437     | 21,01  |
| 2,3-Dihydrofuran                                 | 79 | 43 579      | 44,50 | 295 324     | 107,12 |
| 2,3-Dioxabicyclo[2.2.1]heptane                   | 80 | 1 196 626   | 28,59 | 0           | 0,00   |
| 2,3-Epoxy-carane, (E)-                           | 81 | 77 908      | 19,41 | 60 261      | 15,30  |
| 2,3-Octanedione                                  | 82 | 322 877     | 31,67 | 7 645 564   | 2,06   |
| 2,3-Pentanedione                                 | 83 | 51 317      | 44,19 | 1 482 209   | 34,59  |
| 2,4-Decadienal, (E,E)-                           | 84 | 984 500     | 85,46 | 575 188     | 16,98  |
| 2,4-Heptadienal, (E,E)-                          | 85 | 12 552 401  | 24,70 | 52 185 075  | 5,80   |
| 2,4-Heptadienal, (E,E)-                          | 86 | 6 332 618   | 86,12 | 37 127 788  | 30,88  |
| 2,4-Hexadien-1-ol                                | 87 | 424 810     | 53,23 | 358 694     | 55,49  |
| 2,4-Hexadienal, (E,E)-                           | 88 | 3 053 102   | 4,02  | 37 147 258  | 35,60  |
| 2,4-Nonadienal, (E,E)-                           | 89 | 42 233      | 0,00  | 262 875     | 26,92  |
| 2,4-Pentadienenitrile                            | 90 | 0           | 0,00  | 548 318     | 35,77  |
| 2,5-Furandicarboxaldehyde                        | 91 | 0           | 0,00  | 103 142     | 18,03  |
| 2,6-Bis(1,1-dimethylethyl)-4-(1-oxopropyl)phenol | 92 | 70 011      | 6,87  | 120 524     | 40,34  |
| 2,6-Nonadien-1-ol                                | 93 | 35 163      | 71,79 | 0           | 0,00   |
| 2,6-Nonadienal, (E,Z)-                           | 94 | 151 690     | 54,76 | 546 706     | 18,87  |
| 2,6-Octadiene, 4,5-dimethyl-                     | 95 | 2 107 036   | 5,19  | 465 649     | 38,02  |

|                                                             |     |            |        |            |        |
|-------------------------------------------------------------|-----|------------|--------|------------|--------|
| 2,6-Octadiene, 4-methyl-                                    | 96  | 261 221    | 6,08   | 0          | 0,00   |
| 2-Butanone, 1-bromo-3,3-dimethyl-                           | 97  | 55 433     | 30,72  | 216 243    | 3,63   |
| 2-Butanone, 3-methyl-                                       | 98  | 27 842     | 139,46 | 6 013      | 131,09 |
| 2-Butenal                                                   | 99  | 1 621 103  | 27,74  | 7 629 601  | 36,16  |
| 2-Butene, (Z)-                                              | 100 | 106 054    | 11,20  | 129 251    | 62,79  |
| 2-Butene, 1-bromo-3-methyl-                                 | 101 | 8 564 658  | 11,12  | 199 450    | 25,15  |
| 2-Butenoic acid, 3-hexenyl ester, (E,Z)-                    | 102 | 1 831 817  | 114,47 | 0          | 0,00   |
| 2-Butenoic acid, hexyl ester                                | 103 | 415 799    | 91,65  | 0          | 0,00   |
| 2-Chloro-2-propen-1-ol                                      | 104 | 147 603    | 55,95  | 0          | 0,00   |
| 2-Cyclohexen-1-ol, 3,5,5-trimethyl-                         | 105 | 27 125     | 28,15  | 176 816    | 61,54  |
| 2-Cyclohexen-1-one, 3,5,5-trimethyl-                        | 106 | 3 992 133  | 19,51  | 6 347 346  | 10,57  |
| 2-Decanol                                                   | 107 | 223 716    | 65,42  | 962        | 0,00   |
| 2-Decenal, (Z)-                                             | 108 | 35 106     | 84,25  | 4 209      | 40,13  |
| 2-Decyn-1-ol                                                | 109 | 31 575     | 0,00   | 36 246     | 14,94  |
| 2-Dodecanone                                                | 110 | 7 046      | 0,00   | 50 616     | 33,30  |
| 2-Dodecen-4-yne, (Z)-                                       | 111 | 99 849     | 33,63  | 54 587     | 98,67  |
| 2-Furanmethanol, 5-ethenyltetrahydro-f,f,5-trimethyl-, cis- | 112 | 47 606     | 22,27  | 60 719     | 52,28  |
| 2-Heptanone                                                 | 113 | 908 663    | 27,76  | 774 026    | 56,44  |
| 2-Heptanone, 6-methyl-                                      | 114 | 214 574    | 36,39  | 317 242    | 0,00   |
| 2-Heptenal, (Z)-                                            | 115 | 931 956    | 67,03  | 4 452 299  | 28,06  |
| 2-Heptene                                                   | 116 | 1 644 201  | 6,56   | 207 044    | 92,16  |
| 2-Hexanone, 5-methyl-                                       | 117 | 190 197    | 24,03  | 67 080     | 50,12  |
| 2-Hexen-1-ol, (E)-                                          | 118 | 58 970 317 | 19,83  | 17 984 738 | 66,41  |
| 2-Hexen-4-yn-1-ol, (E)-                                     | 119 | 0          | 0,00   | 1 311 000  | 34,09  |
| 2-Hexenal                                                   | 120 | 41 149 115 | 1,18   | 27 643 791 | 36,00  |
| 2-Hexene, 6-nitro-                                          | 121 | 193 469    | 151,48 | 372 848    | 53,40  |
| 2-Hexyl-1-octanol                                           | 122 | 67 264     | 0,00   | 277 432    | 115,17 |
| 2-Methylbutyl isothiocyanate                                | 123 | 5 817 015  | 33,13  | 3 261 285  | 39,20  |
| 2-Methyl-n-1-tridecene                                      | 124 | 14 139     | 24,22  | 9 127      | 13,12  |
| 2-n-Butyl furan                                             | 125 | 268 064    | 22,22  | 268 198    | 39,68  |
| 2-n-Butylacrolein                                           | 126 | 0          | 0,00   | 547 102    | 104,15 |
| 2-Nitro-2-methyl-1,3-propanediol                            | 127 | 40 199     | 16,27  | 12 688     | 4,64   |
| 2-Octanone                                                  | 128 | 2 437 322  | 17,16  | 557 400    | 10,42  |
| 2-Octen-1-ol, (E)-                                          | 129 | 540 929    | 8,44   | 1 034 615  | 23,56  |
| 2-Octenal, (E)-                                             | 130 | 714 505    | 58,68  | 1 643 714  | 96,69  |
| 2-Pentanol, 2,4-dimethyl-                                   | 131 | 0          | 0,00   | 185 169    | 47,33  |
| 2-Pentanol, 3-methyl-                                       | 132 | 209 840    | 28,80  | 555 755    | 35,30  |
| 2-Pentanol, propanoate                                      | 133 | 39 698     | 11,42  | 489 701    | 0,00   |
| 2-Pentanone                                                 | 134 | 1 255 748  | 18,91  | 470 107    | 0,00   |
| 2-Pentanone, 4-hydroxy-4-methyl-                            | 135 | 224 938    | 6,08   | 693 420    | 0,00   |
| 2-Penten-1-ol, (Z)-                                         | 136 | 67 102 293 | 2,03   | 51 885 257 | 97,24  |
| 2-Penten-1-ol, 2-methyl-, (Z)-                              | 137 | 94 224     | 119,73 | 0          | 0,00   |
| 2-Penten-1-ol, acetate, (Z)-                                | 138 | 544 797    | 33,08  | 160 855    | 85,01  |
| 2-Penten-1-ol, acetate, (Z)-                                | 139 | 52 770     | 12,57  | 0          | 0,00   |
| 2-Pentenal, (E)-                                            | 140 | 3 768 977  | 11,77  | 15 371 549 | 30,63  |
| 2-Pentenal, (E)-                                            | 141 | 0          | 0,00   | 252 768    | 33,68  |
| 2-Pentene, 3-ethyl-                                         | 142 | 44 043     | 32,31  | 43 795     | 75,32  |
| 2-Phenylpropenal                                            | 143 | 0          | 0,00   | 263 586    | 42,88  |
| 2-Propenal                                                  | 144 | 484 597    | 12,37  | 2 719 318  | 15,86  |
| 2-Propyn-1-amine, N-methyl-                                 | 145 | 150 497    | 99,62  | 1 726 667  | 23,30  |
| 2-Propyn-1-ol, propionate                                   | 146 | 418 939    | 10,70  | 507 487    | 50,17  |

|                                                                               |     |             |        |            |       |
|-------------------------------------------------------------------------------|-----|-------------|--------|------------|-------|
| 2-Undecanethiol, 2-methyl-                                                    | 147 | 2 533 536   | 24,09  | 1 462 340  | 9,84  |
| 2-Undecanone, 6,10-dimethyl-                                                  | 148 | 71 993      | 33,25  | 78 750     | 37,09 |
| 3,3-Dimethyl-4-(N-(2-methylbenzyl)amino)-butan-2-one                          | 149 | 70 748      | 29,98  | 93 673     | 17,28 |
| 3,4-Decadiene                                                                 | 150 | 106 078     | 68,62  | 0          | 0,00  |
| 3,4-Hexanedione, 2,2,5-trimethyl-                                             | 151 | 1 109 239   | 1,20   | 1 344 775  | 29,66 |
| 3,4-Pentadienal, 2,2-dimethyl-                                                | 152 | 284 640     | 31,76  | 204 080    | 49,89 |
| 3,5-Diamino-1,2,4-triazole                                                    | 153 | 139 754     | 87,91  | 75 606     | 46,69 |
| 3,5-Diisopropoxy-1,1,1,7,7,7-hexamethyl-3,5-bis(trimethylsiloxy)tetrasiloxane | 154 | 21 818      | 0,00   | 47 250     | 56,75 |
| 3,5-Octadien-2-one, (E,E)-                                                    | 155 | 511 626     | 22,67  | 3 578 598  | 50,30 |
| 3,5-Octadien-2-one, (E,E)-                                                    | 156 | 367 387     | 9,40   | 2 349 679  | 45,67 |
| 3-Buten-2-one, 3-methyl-4-(2,6,6-trimethyl-2-cyclohexen-1-yl)-                | 157 | 13 726      | 45,84  | 22 634     | 34,44 |
| 3-Buten-2-one, 4-(2,2,6-trimethyl-7-oxabicyclo[4.1.0]hept-1-yl)-              | 158 | 117 148     | 14,70  | 956 630    | 10,02 |
| 3-Butenenitrile                                                               | 159 | 1 993 811   | 32,64  | 34 903 057 | 24,71 |
| 3-Chloro-4-methoxytoluene                                                     | 160 | 104 778     | 19,29  | 99 859     | 8,94  |
| 3-Cyclohexen-1-ol, 4-methyl-1-(1-methylethyl)-                                | 161 | 39 483      | 54,89  | 67 773     | 19,50 |
| 3-Cyclohexene-1-carboxaldehyde, 1,3,4-trimethyl-                              | 162 | 18 310      | 0,00   | 60 105     | 85,58 |
| 3-Decyn-2-ol                                                                  | 163 | 0           | 0,00   | 2 566 873  | 56,35 |
| 3-Ethyl-1,5-octadiene                                                         | 164 | 146 705 331 | 1,33   | 13 081 395 | 19,85 |
| 3-Hepten-2-one                                                                | 165 | 0           | 0,00   | 2 853 054  | 49,79 |
| 3-Heptyn-1-ol                                                                 | 166 | 7 762       | 5,92   | 68 623     | 64,57 |
| 3-Hexen-1-ol                                                                  | 167 | 52 258 088  | 12,13  | 3 814 224  | 0,00  |
| 3-Hexen-1-ol, (Z)-                                                            | 168 | 309 194 409 | 39,07  | 73 527 236 | 56,50 |
| 3-Hexen-1-ol, acetate, (E)-                                                   | 169 | 2 473 996   | 40,14  | 0          | 0,00  |
| 3-Hexen-1-ol, acetate, (Z)-                                                   | 170 | 103 141 143 | 10,27  | 978 093    | 11,10 |
| 3-Hexen-1-ol, formate, (Z)-                                                   | 171 | 5 840 346   | 33,35  | 575 008    | 56,04 |
| 3-Hexen-1-ol, propanoate, (Z)-                                                | 172 | 6 263 991   | 11,50  | 60 938     | 36,54 |
| 3-Hexenal, (Z)-                                                               | 173 | 3 251 836   | 16,47  | 4 781 216  | 54,09 |
| 3-Hexene-2,5-diol                                                             | 174 | 0           | 0,00   | 417 395    | 75,86 |
| 3-Hexenoic acid, butyl ester, (Z)-                                            | 175 | 148 029     | 6,55   | 72 140     | 24,81 |
| 3-Hexyn-1-ol                                                                  | 176 | 64 224      | 0,00   | 72 375     | 49,25 |
| 3-Methylpyridazine                                                            | 177 | 14 471      | 0,00   | 621 073    | 58,85 |
| 3-Octyne                                                                      | 178 | 0           | 0,00   | 3 163 740  | 48,15 |
| 3-Pentanol                                                                    | 179 | 8 507 030   | 22,66  | 0          | 0,00  |
| 3-Pentanone                                                                   | 180 | 16 919 850  | 9,54   | 81 229     | 35,57 |
| 3-Penten-1-ol, 2,2,4-trimethyl-                                               | 181 | 123 420     | 11,31  | 73 994     | 0,00  |
| 3-Penten-1-ol, 2-methyl-                                                      | 182 | 8 164 427   | 51,56  | 0          | 0,00  |
| 3-Penten-1-yne, 3-methyl-                                                     | 183 | 840 326     | 18,58  | 97 586     | 83,70 |
| 3-Penten-2-one                                                                | 184 | 0           | 0,00   | 264 037    | 87,09 |
| 3-Pentenal, 4-methyl-                                                         | 185 | 0           | 0,00   | 127 005    | 56,25 |
| 3-Propionyloxytridecane                                                       | 186 | 998 985     | 11,05  | 73 244     | 0,00  |
| 3-Vinyl-1-cyclobutene                                                         | 187 | 272 868     | 17,77  | 90 200     | 22,71 |
| 4-(4-Methylpent-3-enyl)-3,6-dihydro-1,2-dithiin                               | 188 | 764 167     | 37,61  | 230 843    | 7,61  |
| 4,4-Dimethyl-2-cyclopenten-1-one                                              | 189 | 26 258      | 53,94  | 1 510 226  | 80,38 |
| 4,6-Nonadien-8-yn-3-ol, (E,E)-                                                | 190 | 0           | 0,00   | 309 553    | 28,53 |
| 4-Bromoheptane                                                                | 191 | 890 734     | 4,49   | 347 295    | 60,89 |
| 4-Decene, 2,2-dimethyl-, (E)-                                                 | 192 | 72 401      | 9,47   | 0          | 0,00  |
| 4-Heptenal, (Z)-                                                              | 193 | 47 277      | 49,62  | 309 167    | 20,67 |
| 4-Hexen-1-ol, (Z)-                                                            | 194 | 141 505     | 60,46  | 68 381     | 16,58 |
| 4-Hydroxymandelic acid, ethyl ester, di-TMS                                   | 195 | 40 786      | 118,87 | 155 899    | 21,05 |

|                                                         |     |            |        |            |       |
|---------------------------------------------------------|-----|------------|--------|------------|-------|
| 4-Methyl-1,3-pentadiene                                 | 196 | 8 855 639  | 1,20   | 1 875 363  | 0,00  |
| 4-Methyl-1,4-heptadiene                                 | 197 | 24 855     | 17,39  | 39 157     | 2,24  |
| 4-Methyl-5-decanol                                      | 198 | 0          | 0,00   | 5 832 752  | 96,69 |
| 4-Methylpentyl isothiocyanate                           | 199 | 1 843 182  | 41,13  | 451 011    | 28,06 |
| 4-Nonene, 5-nitro-                                      | 200 | 81 865     | 1,43   | 68 826     | 19,38 |
| 4-Octanol, 4,7-dimethyl-                                | 201 | 17 071 864 | 23,50  | 600 762    | 8,43  |
| 4-Octene, 2,2,3,7-tetramethyl-, [S-(E)]-                | 202 | 971 338    | 28,11  | 317 064    | 16,79 |
| 4-Penten-1-ol                                           | 203 | 42 634     | 15,15  | 249 497    | 97,79 |
| 4-tert-Butylcyclohexyl acetate                          | 204 | 258 198    | 37,70  | 84 729     | 7,52  |
| 4-Undecene, 5-methyl-, (E)-                             | 205 | 162 253    | 11,58  | 149 109    | 6,15  |
| 5,9-Undecadien-2-one, 6,10-dimethyl-, (Z)-              | 206 | 178 546    | 116,61 | 440 107    | 8,70  |
| 5-Amino-2,2-dimethylpentanol                            | 207 | 0          | 0,00   | 54 131     | 52,94 |
| 5-Bromo-1-hexene                                        | 208 | 3 653 552  | 70,35  | 67 172     | 62,62 |
| 5-Hexen-2-one, 5-methyl-3-methylene-                    | 209 | 250 160    | 0,00   | 320 373    | 19,88 |
| 5H-Tetrazol-5-amine                                     | 210 | 71 359     | 97,79  | 1 780 199  | 15,72 |
| 5-Tridecene, (Z)-                                       | 211 | 286 427    | 23,89  | 129 150    | 18,54 |
| 6-Methyl-2-heptyne                                      | 212 | 208 380    | 45,22  | 507 700    | 14,10 |
| 6-Octen-2-one, (Z)-                                     | 213 | 6 744 504  | 10,66  | 345 553    | 16,90 |
| 6-Oxabicyclo[3.1.0]hexane                               | 214 | 242 925    | 58,68  | 333 528    | 71,00 |
| 7-Chlorobicyclo[4.1.0]hept-3-ene                        | 215 | 156 683    | 60,73  | 0          | 0,00  |
| 7-Oxabicyclo[2.2.1]heptane, 1-methyl-4-(1-methylethyl)- | 216 | 479 288    | 3,38   | 844 084    | 20,76 |
| 9,12-Octadecadienoic acid, methyl ester, (E,E)-         | 217 | 90 825     | 48,10  | 150 890    | 25,68 |
| Acetic acid, [(aminocarbonyl)amino]oxo-                 | 218 | 29 181 765 | 8,62   | 29 973 993 | 20,13 |
| Acetic acid, hexyl ester                                | 219 | 1 720 991  | 0,00   | 25 628     | 83,85 |
| Acetic acid, methyl ester                               | 220 | 651 795    | 20,61  | 262 146    | 4,39  |
| Acetic acid, pentyl ester                               | 221 | 250 222    | 24,37  | 32 015     | 47,17 |
| Acetic anhydride                                        | 222 | 3 386 089  | 40,67  | 11 701 010 | 31,51 |
| Acetophenone                                            | 223 | 512 343    | 31,42  | 1 038 219  | 22,44 |
| Allyl Isothiocyanate                                    | 224 | 68 282 706 | 28,89  | 9 772 444  | 46,29 |
| á-Pinene                                                | 225 | 1 630 015  | 3,25   | 1 108 520  | 4,87  |
| Azeleonnitrile                                          | 226 | 0          | 0,00   | 1 561 237  | 11,69 |
| Azulene                                                 | 227 | 138 168    | 24,25  | 349 634    | 25,67 |
| Benzaldehyde                                            | 228 | 1 097 831  | 7,89   | 28 176 245 | 49,95 |
| Benzaldehyde, 2-methyl-                                 | 229 | 167 619    | 63,47  | 505 101    | 66,33 |
| Benzaldehyde, 4-ethyl-                                  | 230 | 160 494    | 27,32  | 969 726    | 11,27 |
| Benzene, (1-ethyl-1-propenyl)-                          | 231 | 19 431     | 21,59  | 22 016     | 0,00  |
| Benzene, (1-methylethyl)-                               | 232 | 362 836    | 12,09  | 534 150    | 2,15  |
| Benzene, (2-isothiocyanatoethyl)-                       | 233 | 2 150 897  | 89,81  | 282 646    | 63,52 |
| Benzene, (2-methyl-1-propenyl)-                         | 234 | 301 405    | 7,18   | 396 147    | 16,15 |
| Benzene, (2-methyl-2-propenyl)-                         | 235 | 31 244     | 70,87  | 74 778     | 23,82 |
| Benzene, (isothiocyanatomethyl)-                        | 236 | 256 950    | 77,64  | 53 555     | 82,65 |
| Benzene, 1,2,3-trimethyl-                               | 237 | 601 935    | 64,33  | 1 019 260  | 0,00  |
| Benzene, 1,2,4,5-tetramethyl-                           | 238 | 265 991    | 15,29  | 185 803    | 5,02  |
| Benzene, 1,2-dimethoxy-                                 | 239 | 4 486 424  | 40,57  | 10 237 285 | 18,01 |
| Benzene, 1,3-bis(1,1-dimethylethyl)-                    | 240 | 312 659    | 19,22  | 173 517    | 9,93  |
| Benzene, 1,3-diethyl-5-methyl-                          | 241 | 25 505     | 21,65  | 19 950     | 14,45 |
| Benzene, 1,4-diethyl-                                   | 242 | 37 475     | 59,21  | 86 284     | 4,87  |
| Benzene, 1-ethenyl-4-ethyl-                             | 243 | 118 230    | 10,70  | 156 212    | 12,88 |
| Benzene, 1-ethenyl-4-methyl-                            | 244 | 11 655     | 0,00   | 97 851     | 11,50 |
| Benzene, 1-ethyl-2-methyl-                              | 245 | 238 937    | 7,19   | 431 326    | 87,47 |
| Benzene, 1-methoxy-2-methyl-                            | 246 | 127 239    | 12,69  | 112 568    | 16,59 |



|                                                                                   |     |                   |       |                   |        |
|-----------------------------------------------------------------------------------|-----|-------------------|-------|-------------------|--------|
| Benzene, 1-methoxy-4-(1-methylethyl)-                                             | 247 | 273 531           | 17,68 | 0                 | 0,00   |
| Benzene, 1-methoxy-4-methyl-                                                      | 248 | 403 463           | 16,50 | 351 176           | 11,79  |
| Benzene, 1-methyl-3-(1-methylethyl)-                                              | 249 | 92 385            | 8,95  | 64 568            | 7,69   |
| Benzene, 1-methyl-3-propyl-                                                       | 250 | 85 087            | 9,87  | 167 497           | 17,01  |
| Benzene, 1-methyl-4-(1-methylethyl)-                                              | 251 | <b>2 301 153</b>  | 2,38  | <b>1 652 690</b>  | 9,71   |
| Benzene, 2-ethyl-1,3-dimethyl-                                                    | 252 | 180 101           | 0,00  | 136 379           | 1,80   |
| Benzene, 2-propenyl-                                                              | 253 | 13 254            | 33,47 | 32 866            | 14,55  |
| Benzene, hexyl-                                                                   | 254 | 32 796            | 27,32 | 59 473            | 65,99  |
| Benzene, methoxy-                                                                 | 255 | 653 300           | 3,91  | 724 205           | 7,65   |
| Benzene, propyl-                                                                  | 256 | 119 218           | 9,34  | 638 254           | 14,34  |
| Benzeneacetaldehyde                                                               | 257 | 5 139 853         | 5,30  | 22 753 333        | 29,17  |
| Benzeneethanamine, N-[(pentafluorophenyl)methylene]-á,4-bis[(trimethylsilyl)oxy]- | 258 | 27 179            | 5,64  | 30 869            | 18,89  |
| Benzenemethanesulfonamide                                                         | 259 | 501 456           | 33,09 | 1 146 008         | 12,85  |
| Benzenemethanol, 3,5-dimethyl-                                                    | 260 | 31 556            | 11,07 | 21 805            | 21,33  |
| Benzenemethanol, 4-(1-methylethyl)-                                               | 261 | 182 195           | 30,18 | 143 472           | 66,44  |
| Benzenemethanol, f,f-dimethyl-                                                    | 262 | 11 802            | 6,35  | 30 094            | 92,94  |
| Benzenepropanenitrile                                                             | 263 | <b>139 364</b>    | 9,46  | <b>14 795 569</b> | 23,59  |
| Benzenepropanoic acid, f-[[[(trimethylsilyl)oxy]imino]-, trimethylsilyl ester     | 264 | 51 185            | 30,29 | 49 800            | 43,15  |
| Benzyl nitrile                                                                    | 265 | 354 605           | 32,05 | 865 745           | 5,08   |
| Bicyclo[2.2.1]heptan-2-one, 1,7,7-trimethyl-, (1S)-                               | 266 | 138 648           | 24,06 | 385 525           | 17,11  |
| Bicyclo[2.2.1]heptan-3-one, 6,6-dimethyl-2-methylene-                             | 267 | 11 410            | 33,04 | 19 546            | 10,67  |
| Bicyclo[3.1.0]hexan-2-ol, 2-methyl-5-(1-methylethyl)-, (1f,2á,5f)-                | 268 | 40 450            | 93,15 | 44 501            | 77,75  |
| Bicyclo[3.1.1]hept-2-ene, 2,6,6-trimethyl-, (ñ)-                                  | 269 | <b>8 775 746</b>  | 3,23  | <b>5 400 097</b>  | 3,22   |
| Bicyclo[3.1.1]hept-3-en-2-ol, 4,6,6-trimethyl-                                    | 270 | 445 837           | 51,78 | 235 541           | 34,52  |
| Bicyclo[3.1.1]heptan-3-one, 2,6,6-trimethyl-, (1f,2á,5f)-                         | 271 | 28 209            | 0,00  | 129 023           | 60,62  |
| Bicyclo[4.2.0]octa-1,3,5-triene, 7-isopropyl-                                     | 272 | 23 036            | 11,86 | 14 608            | 22,67  |
| Bicyclo[7.2.0]undec-4-ene, 4,11,11-trimethyl-8-methylene-, [1R-(1R*,4Z,9S*)]-     | 273 | 49 256            | 41,82 | 88 389            | 72,02  |
| Butanal                                                                           | 274 | 276 715           | 1,06  | 1 664 318         | 8,35   |
| Butanal, 2-methyl-                                                                | 275 | 811 976           | 31,23 | 8 500 177         | 40,29  |
| Butanal, 3-methyl-                                                                | 276 | 437 320           | 20,05 | 4 234 237         | 34,92  |
| Butane, 1-bromo-2-methyl-                                                         | 277 | <b>849 628</b>    | 17,61 | <b>913 227</b>    | 45,57  |
| Butane, 2-bromo-2-methyl-                                                         | 278 | 581 072           | 45,21 | 0                 | 0,00   |
| Butane, 2-cyclopropyl-                                                            | 279 | 0                 | 0,00  | 247 413           | 65,44  |
| Butane, 2-isocyanato-                                                             | 280 | 0                 | 0,00  | 156 852           | 63,52  |
| Butane, 2-isothiocyanato-                                                         | 281 | 864 003           | 26,94 | 262 334           | 21,20  |
| Butane, 2-methyl-                                                                 | 282 | 2 423 928         | 14,25 | 0                 | 0,00   |
| Butanenitrile, 4-(methylthio)-                                                    | 283 | 152 206           | 45,23 | 1 458 407         | 148,21 |
| Butanoic acid, 2-butoxy-1-methyl-2-oxoethyl ester                                 | 284 | 263 481           | 65,39 | 2 550 143         | 51,92  |
| Butanoic acid, 2-methyl-, hexyl ester                                             | 285 | 5 425 721         | 52,76 | 66 462            | 31,03  |
| Butanoic acid, 2-pentenyl ester, (Z)-                                             | 286 | 365 437           | 22,50 | 69 390            | 0,00   |
| Butanoic acid, 3-hexenyl ester, (E)-                                              | 287 | <b>20 852 511</b> | 1,26  | <b>3 599 072</b>  | 20,77  |
| Butanoic acid, hexyl ester                                                        | 288 | 1 300 933         | 9,74  | 24 514            | 10,99  |
| Butyric acid, 1-propylpentyl ester                                                | 289 | 59 272            | 0,00  | 64 723            | 32,66  |
| Camphene                                                                          | 290 | 73 190            | 0,00  | 154 574           | 26,41  |
| Carbon disulfide                                                                  | 291 | <b>14 622 611</b> | 10,41 | <b>6 744 663</b>  | 29,13  |
| cis-3-Hexenyl-f-methylbutyrate                                                    | 292 | 27 920            | 31,59 | 8 645             | 9,23   |
| cis-Pinen-3-ol                                                                    | 293 | 55 193            | 8,18  | 0                 | 0,00   |
| Cyclobut-1-enylmethanol                                                           | 294 | 204 107           | 49,21 | 388 989           | 26,49  |
| Cyclododecene, (E)-                                                               | 295 | 47 791            | 52,38 | 0                 | 0,00   |

|                                                                             |     |            |        |            |        |
|-----------------------------------------------------------------------------|-----|------------|--------|------------|--------|
| Cyclohexa-1,3-diene, 5,6-diethyl-                                           | 296 | 0          | 0,00   | 422 984    | 36,04  |
| Cyclohexane, 1-ethenyl-1-methyl-2,4-bis(1-methylethenyl)-, [1S-(1f,2á,4á)]- | 297 | 117 668    | 25,45  | 78 367     | 15,71  |
| Cyclohexane, chloro-                                                        | 298 | 4 371 024  | 23,80  | 112 433    | 103,74 |
| Cyclohexanol, 1-methyl-4-(1-methylethenyl)-, acetate                        | 299 | 24 036     | 79,20  | 45 671     | 20,40  |
| Cyclohexanol, 2,4-dimethyl-                                                 | 300 | 89 502     | 132,27 | 103 227    | 76,04  |
| Cyclohexanol, 5-methyl-2-(1-methylethyl)-, [1S-(1f,2á,5á)]-                 | 301 | 35 061     | 28,30  | 159 556    | 15,82  |
| Cyclohexanone, 2,2,6-trimethyl-                                             | 302 | 880 780    | 0,00   | 402 278    | 17,54  |
| Cyclohexanone, 2,2-dimethyl-5-(3-methyloxiranyl)-, [2f(R*),3f]-(.+.-)-      | 303 | 56 590     | 33,61  | 183 865    | 44,83  |
| Cyclohexanone, 5-methyl-2-(1-methylethyl)-                                  | 304 | 51 634     | 19,30  | 142 632    | 0,00   |
| Cyclohexene, 1-methyl-4-(1-methylethylidene)-                               | 305 | 1 241 117  | 4,40   | 678 302    | 25,42  |
| Cyclopentane, (methylthio)-                                                 | 306 | 515 464    | 75,36  | 23 076     | 0,00   |
| Cyclopentane, 1,3-dimethyl-2-(1-methylethenyl)-, (1f,2f,3á)-                | 307 | 60 809     | 5,50   | 125 615    | 9,46   |
| Cyclopentane, 1-hexyl-3-methyl-                                             | 308 | 0          | 0,00   | 65 465     | 51,74  |
| Cyclopentane, 1-methyl-3-(2-methylpropyl)-                                  | 309 | 15 812     | 11,76  | 69 202     | 100,00 |
| Cyclopentane, 2-ethylidene-1,1-dimethyl-                                    | 310 | 134 554    | 16,38  | 70 106     | 72,21  |
| Cyclopentane, bromo-                                                        | 311 | 4 143 192  | 8,80   | 22 598     | 0,00   |
| Cyclopentane, methyl-                                                       | 312 | 0          | 0,00   | 1 843 910  | 26,29  |
| Cyclopentane, nitro-                                                        | 313 | 228 776    | 52,53  | 0          | 0,00   |
| Cyclopentyl isothiocyanate                                                  | 314 | 71 584     | 44,48  | 244 717    | 21,21  |
| Cyclopropane, 1-ethyl-2-methyl-, cis-                                       | 315 | 84 067     | 81,01  | 0          | 0,00   |
| Cyclopropane, 2-(1,1-dimethyl-2-propenyl)-1,1-dimethyl-                     | 316 | 125 248    | 46,68  | 0          | 0,00   |
| Cyclopropane, ethyl-                                                        | 317 | 2 280 261  | 1,45   | 1 325 472  | 0,00   |
| Cyclopropane, isothiocyanato-                                               | 318 | 2 627 821  | 43,82  | 198 424    | 0,00   |
| Cyclopropane, propyl-                                                       | 319 | 2 472 696  | 6,94   | 186 817    | 0,00   |
| Cyclopropane, tetramethylpropylidene-                                       | 320 | 20 665     | 112,97 | 2 910      | 25,16  |
| Cyclopropane-1,1,2,2-tetracarbonitrile, 3-ethyl-3-methyl-                   | 321 | 976 739    | 30,97  | 1 331 919  | 32,15  |
| Decanal                                                                     | 322 | 474 683    | 50,96  | 972 082    | 25,87  |
| Decane                                                                      | 323 | 633 497    | 47,17  | 1 050 716  | 32,70  |
| Decane, 2,6,7-trimethyl-                                                    | 324 | 469 895    | 7,51   | 634 454    | 72,74  |
| Diallyl carbonate                                                           | 325 | 12 931 002 | 10,40  | 36 143 905 | 49,37  |
| Diazene, dimethyl-                                                          | 326 | 176 959    | 7,77   | 0          | 0,00   |
| Dibenzo[cd,gl]indazole-3-sulfonic acid, 2,6-dihydro-6-oxo-                  | 327 | 835 265    | 155,33 | 3 056 982  | 134,42 |
| Dibutyl phthalate                                                           | 328 | 300 679    | 64,62  | 1 014 917  | 74,47  |
| Dihydromyrcene                                                              | 329 | 100 798    | 25,23  | 431 121    | 63,88  |
| Dimethyl sulfide                                                            | 330 | 7 817 123  | 9,91   | 5 601 075  | 7,20   |
| Dimethyl trisulfide                                                         | 331 | 67 002 388 | 18,34  | 19 480 654 | 59,11  |
| Disulfide, dimethyl                                                         | 332 | 29 361 807 | 6,95   | 18 615 463 | 36,71  |
| Disulfide, methyl (methylthio)methyl                                        | 333 | 20 351 960 | 39,11  | 277 454    | 45,34  |
| Disulfide, methyl 2-propenyl                                                | 334 | 224 124    | 28,36  | 57 523     | 41,53  |
| Disulfide, methyl propyl                                                    | 335 | 480 120    | 52,66  | 0          | 0,00   |
| Dodecanal                                                                   | 336 | 202 545    | 106,01 | 200 816    | 43,40  |
| Estragole                                                                   | 337 | 111 826    | 37,09  | 116 223    | 6,41   |
| Ethane, (methylthio)-                                                       | 338 | 398 025    | 60,98  | 0          | 0,00   |
| Ethanol, 2-(ethylthio)-                                                     | 339 | 180 216    | 39,80  | 7 861      | 0,00   |
| Ethanol, 2-nitro-                                                           | 340 | 929 247    | 53,68  | 0          | 0,00   |
| Ethanone, 1-(3-ethyloxiranyl)-                                              | 341 | 0          | 0,00   | 19 142     | 48,71  |
| Ethanone, 1-(3-methylphenyl)-                                               | 342 | 223 647    | 29,86  | 340 830    | 13,36  |
| Ethenamine, N-methylene-                                                    | 343 | 398 361    | 10,76  | 595 921    | 4,64   |
| Ether, tert-butyl isopropylidenecyclopropyl                                 | 344 | 4 070 573  | 5,34   | 92 386     | 0,00   |
| Ethyl Acetate                                                               | 345 | 11 134 434 | 59,22  | 814 862    | 9,45   |

|                                              |     |            |        |             |        |
|----------------------------------------------|-----|------------|--------|-------------|--------|
| Ethylbenzene                                 | 346 | 292 225    | 12,40  | 2 237 726   | 10,30  |
| Eucalyptol                                   | 347 | 795 274    | 9,11   | 1 467 422   | 11,37  |
| Formic acid, ethenyl ester                   | 348 | 45 206     | 9,32   | 77 545      | 0,00   |
| Furan                                        | 349 | 163 457    | 22,46  | 443 151     | 58,10  |
| Furan, 2,3-dihydro-4-(1-methylpropyl)-, (S)- | 350 | 63 499     | 43,70  | 42 676      | 68,44  |
| Furan, 2,3-dihydro-5-methyl-                 | 351 | 0          | 0,00   | 145 151     | 27,59  |
| Furan, 2-butyltetrahydro-                    | 352 | 79 338     | 27,81  | 430 348     | 110,74 |
| Furan, 2-butyltetrahydro-                    | 353 | 0          | 0,00   | 1 085 706   | 41,74  |
| Furan, 2-ethyl-                              | 354 | 17 833 776 | 14,38  | 183 486 875 | 24,18  |
| Furan, 2-ethyl-5-methyl-                     | 355 | 60 408     | 0,00   | 57 306      | 54,12  |
| Furan, 2-methyl-                             | 356 | 2 973 139  | 15,91  | 1 451 687   | 28,59  |
| Furan, 2-pentyl-                             | 357 | 13 476 195 | 36,39  | 11 324 854  | 33,05  |
| Furan, 2-propyl-                             | 358 | 365 505    | 7,60   | 47 506      | 72,20  |
| Furan, tetrahydro-                           | 359 | 6 577 187  | 15,11  | 7 934 173   | 18,81  |
| Furan, tetrahydro-2-(methoxymethyl)-         | 360 | 59 563     | 12,96  | 0           | 0,00   |
| Furan, tetrahydro-2-methyl-                  | 361 | 0          | 0,00   | 1 809 060   | 21,74  |
| Heptanal                                     | 362 | 879 317    | 55,36  | 6 069 692   | 30,06  |
| Heptane                                      | 363 | 327 730    | 16,71  | 3 880 199   | 149,39 |
| Heptane, 2,4-dimethyl-                       | 364 | 2 475 820  | 61,37  | 672 082     | 36,65  |
| Heptane, 3-ethyl-                            | 365 | 36 491     | 29,99  | 53 756      | 43,73  |
| Heptanonitrile                               | 366 | 0          | 0,00   | 27 960 300  | 6,05   |
| Hex-3-ene-1,6-diol                           | 367 | 162 619    | 0,00   | 984 072     | 18,04  |
| Hexadecanal                                  | 368 | 48 528     | 50,68  | 462 003     | 37,99  |
| Hexadecane                                   | 369 | 252 142    | 29,72  | 129 557     | 62,95  |
| Hexanal                                      | 370 | 23 494 988 | 13,87  | 58 243 384  | 102,72 |
| Hexanal, 4-methyl-                           | 371 | 48 438     | 24,55  | 1 446 898   | 75,98  |
| Hexane                                       | 372 | 2 826 917  | 18,11  | 7 106 369   | 53,05  |
| Hexane, 1-(methylthio)-                      | 373 | 317 379    | 109,49 | 0           | 0,00   |
| Hexane, 1-isocyanato-                        | 374 | 51 118     | 6,33   | 197 435     | 12,76  |
| Hexane, 1-isothiocyanato-                    | 375 | 795 607    | 80,73  | 46 664      | 55,96  |
| Hexane, 4-ethyl-2-methyl-                    | 376 | 1 940 020  | 39,20  | 3 443 088   | 35,73  |
| Hexanenitrile                                | 377 | 0          | 0,00   | 28 664 520  | 10,61  |
| Hexanenitrile                                | 378 | 0          | 0,00   | 6 177 534   | 13,88  |
| Hexanenitrile, 5-methyl-                     | 379 | 0          | 0,00   | 15 692 741  | 5,11   |
| Hexanoic acid, 2-hexenyl ester, (E)-         | 380 | 364 229    | 37,25  | 68 891      | 18,82  |
| Hexanoic acid, 3-hexenyl ester, (Z)-         | 381 | 1 226 542  | 36,78  | 149 834     | 13,64  |
| Hexanoic acid, hexyl ester                   | 382 | 73 125     | 57,05  | 0           | 0,00   |
| Hexanoic acid, methyl ester                  | 383 | 94 335     | 30,94  | 394 005     | 76,18  |
| Indane                                       | 384 | 24 490     | 0,00   | 80 328      | 11,46  |
| Isobutyl ether                               | 385 | 118 768    | 16,44  | 49 271      | 43,75  |
| Isobutyl isothiocyanate                      | 386 | 4 260 696  | 49,08  | 616 970     | 62,67  |
| Isopropyl isothiocyanate                     | 387 | 118 070    | 32,83  | 42 098      | 23,90  |
| L-Fenchone                                   | 388 | 369 709    | 29,36  | 349 472     | 12,22  |
| Lilac alcohol D                              | 389 | 110 435    | 15,45  | 0           | 0,00   |
| Limonene                                     | 390 | 3 225 995  | 16,52  | 2 247 280   | 71,89  |
| L-Valine, N-glycyl-                          | 391 | 145 345    | 15,49  | 37 481      | 27,01  |
| Mercaptoacetone                              | 392 | 833 605    | 31,19  | 0           | 0,00   |
| Methacrolein                                 | 393 | 341 025    | 47,73  | 440 781     | 6,41   |
| Methacrolein                                 | 394 | 0          | 0,00   | 100 479     | 98,76  |
| Methallyl cyanide                            | 395 | 223 886    | 20,44  | 22 925 968  | 18,79  |
| Methane, (methylsulfinyl)(methylthio)-       | 396 | 389 778    | 45,96  | 0           | 0,00   |



|                                                                                              |     |            |        |            |        |
|----------------------------------------------------------------------------------------------|-----|------------|--------|------------|--------|
| Methyl ethyl disulfide                                                                       | 397 | 576 494    | 61,54  | 52 593     | 65,04  |
| Methyl formate                                                                               | 398 | 1 514 699  | 35,94  | 4 246 023  | 29,16  |
| Methyl pentyl disulfide                                                                      | 399 | 811 530    | 91,39  | 52 042     | 59,81  |
| Monoethyl carbonotrithioate                                                                  | 400 | 612 819    | 65,44  | 332 226    | 47,45  |
| Monomethyl carbonotrithioate                                                                 | 401 | 166 169    | 10,24  | 98 809     | 85,50  |
| N,N'-Bis(2,6-dimethyl-6-nitrosohept-2-en-4-one)                                              | 402 | 0          | 0,00   | 188 253    | 32,54  |
| Naphthalene, 1,2,3,5,6,7,8,8a-octahydro-1,8a-dimethyl-7-(1-methylethenyl)-, [1R-(1r,7a,8a)]- | 403 | 84 537     | 26,30  | 93 146     | 11,11  |
| n-Caproic acid vinyl ester                                                                   | 404 | 0          | 0,00   | 60 014     | 66,29  |
| Nonanal                                                                                      | 405 | 3 116 710  | 42,32  | 5 199 982  | 19,73  |
| Nonanal, 3-(methylthio)-                                                                     | 406 | 1 252 025  | 129,29 | 123 616    | 27,44  |
| Nonane                                                                                       | 407 | 1 037 579  | 61,14  | 417 114    | 42,55  |
| Nonane, 2-methyl-                                                                            | 408 | 66 474     | 18,26  | 130 219    | 83,98  |
| Nonane, 3,7-dimethyl-                                                                        | 409 | 105 357    | 67,42  | 54 901     | 41,24  |
| Nonane, 4-ethyl-5-methyl-                                                                    | 410 | 51 524     | 0,00   | 106        | 22,67  |
| n-Pentyl isothiocyanate                                                                      | 411 | 1 390 511  | 69,86  | 90 519     | 53,81  |
| n-Valeric acid cis-3-hexenyl ester                                                           | 412 | 42 582 022 | 41,53  | 7 165 007  | 34,53  |
| Octanal                                                                                      | 413 | 288 706    | 30,63  | 1 415 234  | 45,11  |
| Octane, 2,6-dimethyl-                                                                        | 414 | 18 855     | 8,15   | 68 436     | 59,92  |
| Octane, 4-chloro-                                                                            | 415 | 97 464     | 85,69  | 187 890    | 53,69  |
| Octanenitrile                                                                                | 416 | 66 551     | 0,00   | 238 330    | 3,83   |
| Octanenitrile                                                                                | 417 | 0          | 0,00   | 64 578     | 13,58  |
| Octanoic acid, ethyl ester                                                                   | 418 | 131 096    | 96,92  | 0          | 0,00   |
| Oxalic acid                                                                                  | 419 | 632 485    | 38,17  | 0          | 0,00   |
| Oxalic acid, allyl decyl ester                                                               | 420 | 29 145     | 96,44  | 210        | 173,21 |
| Oxalic acid, allyl dodecyl ester                                                             | 421 | 406 224    | 34,23  | 297 092    | 29,80  |
| Oxalic acid, allyl dodecyl ester                                                             | 422 | 58 946     | 38,00  | 9 540      | 106,06 |
| Oxalic acid, allyl hexadecyl ester                                                           | 423 | 245 986    | 44,49  | 163 621    | 11,92  |
| Oxalic acid, allyl octadecyl ester                                                           | 424 | 375 166    | 72,97  | 127 431    | 127,70 |
| Oxalic acid, dodecyl hexyl ester                                                             | 425 | 10 620     | 6,80   | 7 459      | 10,24  |
| Oxalic acid, isobutyl hexadecyl ester                                                        | 426 | 193 613    | 54,59  | 252 622    | 0,00   |
| Oxalic acid, isobutyl nonyl ester                                                            | 427 | 626 355    | 18,33  | 449 490    | 56,07  |
| Oxalic acid, isobutyl pentyl ester                                                           | 428 | 477 204    | 2,81   | 349 091    | 64,33  |
| Oxirane, pentyl-                                                                             | 429 | 453 075    | 10,76  | 1 640 273  | 17,58  |
| Oxiranemethanol, 3-methyl-3-(4-methyl-3-pentenyl)-                                           | 430 | 64 272     | 22,94  | 89 107     | 61,81  |
| o-Xylene                                                                                     | 431 | 1 032 527  | 5,92   | 9 449 665  | 14,43  |
| Pentadecane                                                                                  | 432 | 3 990 881  | 140,12 | 175 176    | 0,00   |
| Pentanal                                                                                     | 433 | 365 651    | 0,00   | 581 931    | 9,25   |
| Pentanal, 2-methyl-                                                                          | 434 | 23 107     | 32,12  | 60 900     | 28,54  |
| Pentane                                                                                      | 435 | 4 448 450  | 6,28   | 4 038 693  | 60,29  |
| Pentane, 1-(methylthio)-                                                                     | 436 | 3 565 988  | 115,26 | 49 467     | 53,63  |
| Pentane, 2,2,4,4-tetramethyl-                                                                | 437 | 3 433 975  | 4,10   | 3 293 482  | 118,18 |
| Pentane, 2-chloro-4-methyl-                                                                  | 438 | 77 432     | 109,40 | 135 316    | 101,21 |
| Pentanenitrile                                                                               | 439 | 0          | 0,00   | 230 528    | 36,48  |
| Pentanenitrile, 4,4-dimethyl-5-oxo-                                                          | 440 | 222 975    | 89,03  | 104 627    | 55,70  |
| Pentanenitrile, 4-methyl-                                                                    | 441 | 61 896     | 0,00   | 31 696 690 | 46,66  |
| Pentanenitrile, 5-(methylthio)-                                                              | 442 | 727 210    | 36,07  | 764 680    | 136,83 |
| Pentanethioic acid, S-ethyl ester                                                            | 443 | 105 670    | 37,24  | 94 719     | 25,96  |
| Pentanoic acid, 10-undecenyl ester                                                           | 444 | 218 095    | 3,50   | 86 510     | 11,46  |
| Pentanoic acid, 2-methyl-, methyl ester                                                      | 445 | 0          | 0,00   | 170 613    | 61,10  |
| Pentanoic acid, 4-oxo-                                                                       | 446 | 39 718     | 24,97  | 222 799    | 23,95  |
| Pentasulfide, dimethyl                                                                       | 447 | 363 435    | 24,47  | 133 711    | 96,77  |

|                                                                   |     |             |        |            |        |
|-------------------------------------------------------------------|-----|-------------|--------|------------|--------|
| Phenol, 2-ethyl-                                                  | 448 | 537 860     | 50,43  | 599 495    | 30,28  |
| Phenol, 4-(1-methylpropyl)-                                       | 449 | 222 232     | 0,00   | 187 311    | 16,48  |
| Phenol, 4-(2-aminopropyl)-                                        | 450 | 162 245     | 37,08  | 0          | 0,00   |
| Phenol, 4-ethyl-3-methyl-                                         | 451 | 17 912      | 38,58  | 26 551     | 72,57  |
| Propanal                                                          | 452 | 2 145 186   | 10,84  | 16 074 776 | 38,31  |
| Propanal, 2-methyl-                                               | 453 | 208 883     | 24,54  | 1 623 141  | 41,99  |
| Propanal, 3-(methylthio)-                                         | 454 | 269 347     | 17,56  | 699 959    | 18,25  |
| Propane, 1-(methylthio)-                                          | 455 | 811 971     | 24,44  | 2 880 877  | 78,39  |
| Propane, 1-(methylthio)-                                          | 456 | 154 043     | 49,52  | 0          | 0,00   |
| Propane, 1-isothiocyanato-3-(methylthio)-                         | 457 | 3 496 962   | 97,42  | 115 346    | 27,29  |
| Propane, 2-bromo-                                                 | 458 | 2 744 352   | 8,11   | 8 856 996  | 27,29  |
| Propane, 2-methoxy-2-methyl-                                      | 459 | 173 974     | 122,49 | 685 256    | 88,95  |
| Propanoic acid, 2,2-dimethyl-, anhydride with diethylborinic acid | 460 | 5 758       | 0,00   | 65 531     | 51,55  |
| Propanoic acid, 2-methyl-, 3-hydroxy-2,4,4-trimethylpentyl ester  | 461 | 773 806     | 35,27  | 7 771 954  | 94,27  |
| Propanoic acid, 2-methyl-, hexyl ester                            | 462 | 1 490 257   | 34,16  | 16 025     | 30,79  |
| Propanoic acid, 2-penten-1-yl ester (Z)-                          | 463 | 2 644 236   | 27,76  | 75 594     | 74,19  |
| Propanoic acid, hexyl ester                                       | 464 | 2 202 718   | 28,40  | 23 627     | 81,83  |
| p-Xylene                                                          | 465 | 807 982     | 6,08   | 3 529 647  | 13,98  |
| Pyrazine, 2-methoxy-3-(1-methylethyl)-                            | 466 | 28 100      | 20,90  | 132 299    | 8,24   |
| Pyrazine, 2-methoxy-3-(1-methylpropyl)-                           | 467 | 17 687      | 15,34  | 74 402     | 3,30   |
| ř-Phellandrene                                                    | 468 | 76 746      | 16,52  | 40 249     | 39,06  |
| Styrene                                                           | 469 | 311 758     | 12,45  | 14 040 682 | 13,45  |
| Sulfide, methyl 1-methyl-2-butenyl                                | 470 | 65 578      | 55,34  | 0          | 0,00   |
| Sulfurous acid, cyclohexylmethyl hexadecyl ester                  | 471 | 40 563      | 32,52  | 42 143     | 43,78  |
| Sulfurous acid, cyclohexylmethyl hexyl ester                      | 472 | 368 810     | 14,43  | 319 190    | 65,52  |
| Sulfurous acid, hexyl pentyl ester                                | 473 | 161 393     | 41,88  | 40 974     | 13,54  |
| Sulfurous acid, hexyl tridecyl ester                              | 474 | 1 911 280   | 112,46 | 57 058     | 156,28 |
| Tetradecane                                                       | 475 | 3 257 598   | 4,84   | 5 553 173  | 4,44   |
| Tetrahydrofuran, 2-hexyl-                                         | 476 | 232 451     | 0,00   | 58 614     | 11,26  |
| Thiocyanic acid, 2-propenyl ester                                 | 477 | 2 057 410   | 135,17 | 21 470     | 27,10  |
| Thiocyanic acid, methyl ester                                     | 478 | 140 495 321 | 16,18  | 44 588 072 | 46,48  |
| Thiophene, 2-ethyl-                                               | 479 | 25 397 292  | 4,30   | 49 761 734 | 8,55   |
| Thiophene, 2-methyl-                                              | 480 | 210 064     | 25,95  | 147 577    | 50,66  |
| Thiophene, 2-pentyl-                                              | 481 | 356 183     | 42,24  | 198 731    | 34,89  |
| Thiophene, 2-propyl-                                              | 482 | 33 413      | 27,30  | 0          | 0,00   |
| Thiophene, tetrahydro-                                            | 483 | 450 739     | 99,67  | 22 456     | 138,26 |
| trans-2-(2-Pentenyl)furan                                         | 484 | 869 195     | 7,90   | 1 214 303  | 12,94  |
| trans-3-Nonen-2-one                                               | 485 | 0           | 0,00   | 67 274     | 42,50  |
| trans-4-Decene                                                    | 486 | 24 983      | 10,73  | 25 753     | 17,93  |
| Undecane                                                          | 487 | 40 427      | 19,22  | 25 780     | 0,00   |
| Undecane, 3,5-dimethyl-                                           | 488 | 0           | 0,00   | 166 935    | 5,29   |
| Urea                                                              | 489 | 1 688 414   | 17,26  | 9 815 486  | 17,61  |
| Total [peak area]                                                 |     | 2184741395  |        | 1860829650 |        |

Compounds were color-coded according to their peak areas from blue (smallest) to red (highest). Compounds with peak abundances of >150 000 000 extracted from fresh tissues were highlighted in blue, these for freezed/thawed – in red colour. Relative standard deviations (RDS) were provided in separate columns for fresh and freezed/thawed samples (n=3). Relative standard deviation (RSD) is expressed in % (SD\*100/mean)

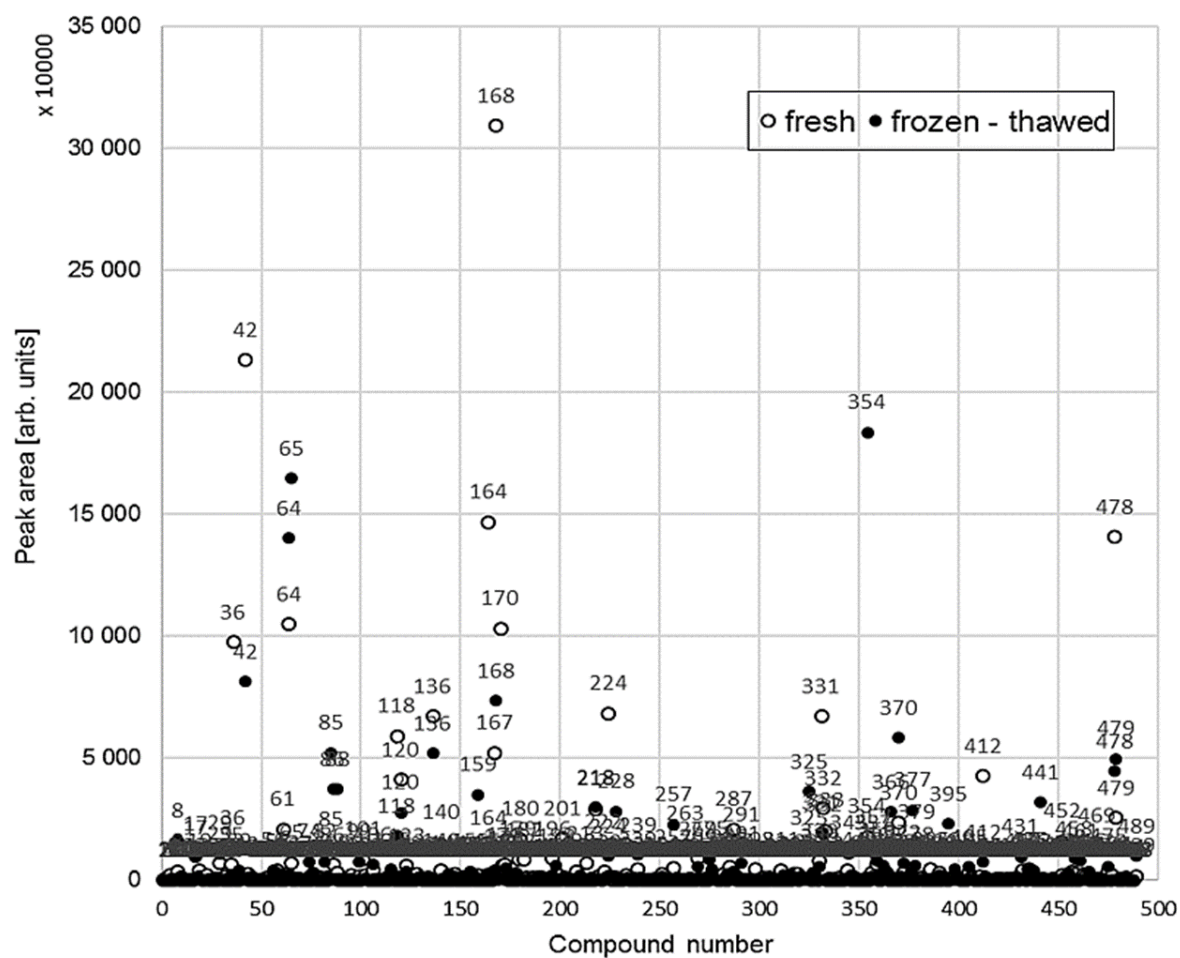

**Figure S1.** Compounds extracted by SPME, characteristic for fresh and frozen – thawed broccoli florets. Metabolite numbers correspond to those in Table S1 (Supplementary Material).

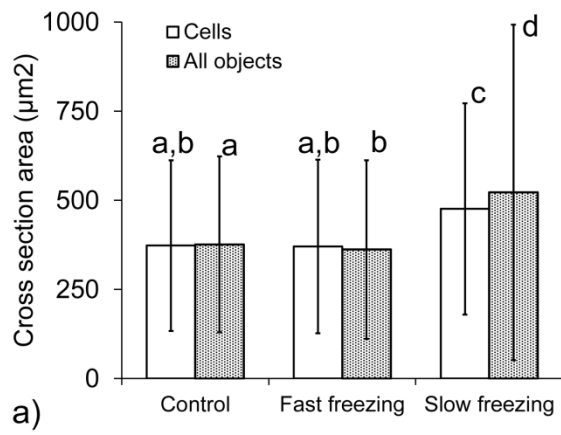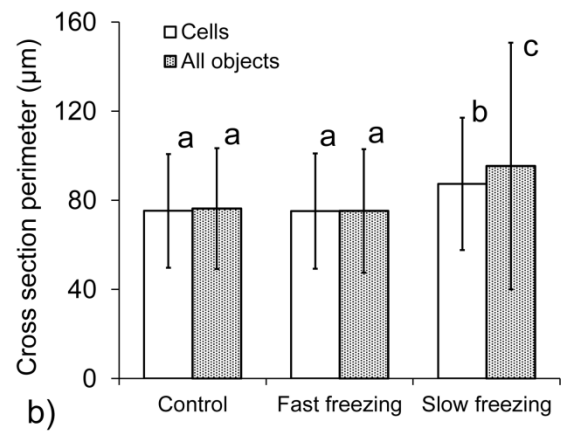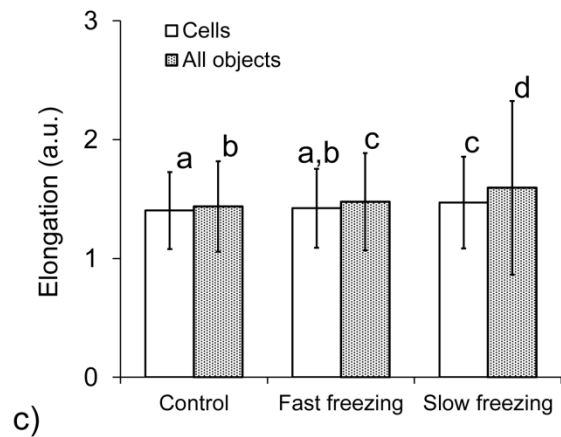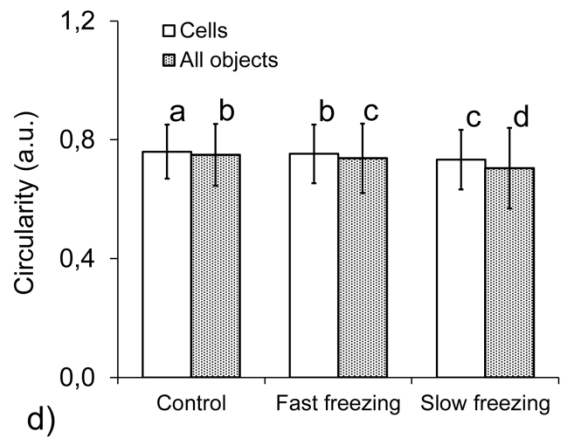

**Figure S2.** Average values of geometric parameters together with standard deviations for imaging from the parenchymatic tissue area. Letter designations symbolize belonging to homogeneous groups (according to the ANOVA test - Tukey's HSD test).

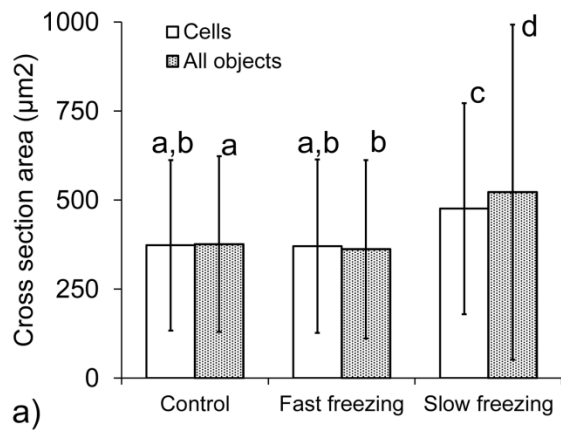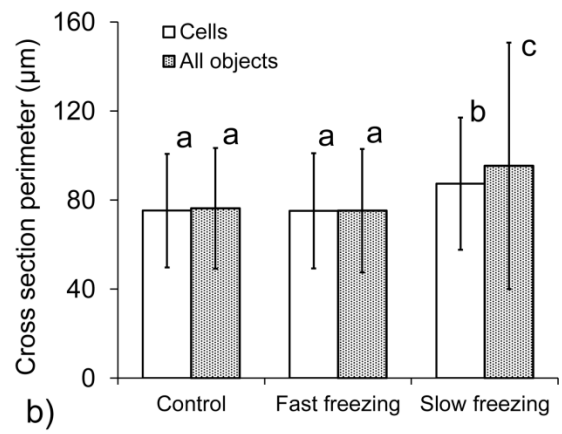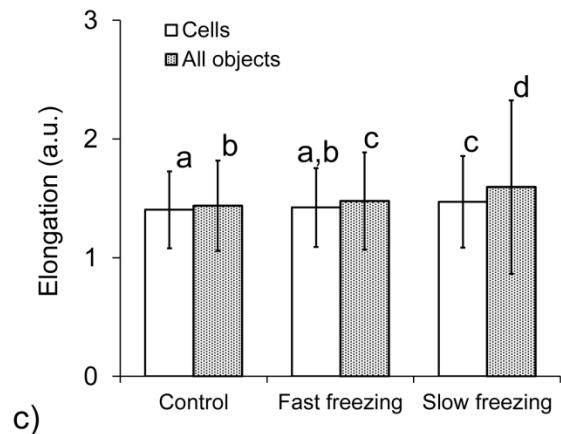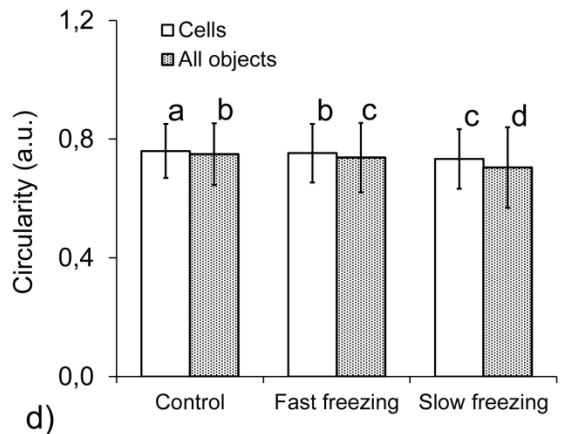

**Figure S3.** Average values of geometric parameters together with standard deviations for imaging from the epidermal tissue area. Letter designations symbolize belonging to homogeneous groups (according to the ANOVA test - Tukey's HSD test).

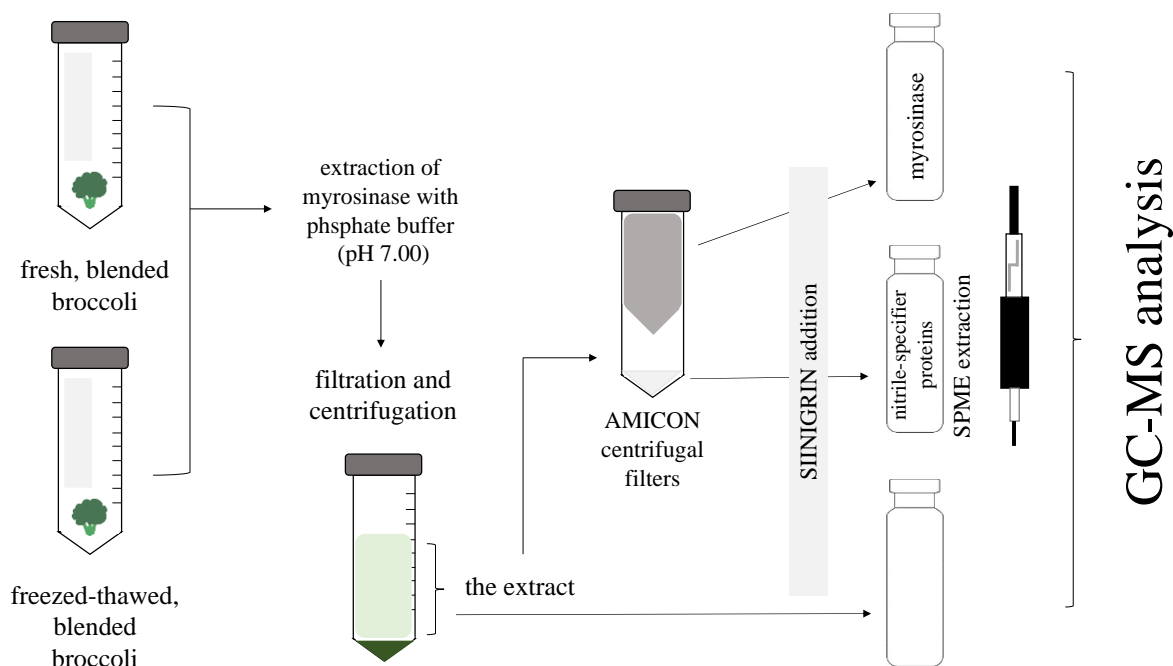

**Figure S4.** The scheme of enzymes activity assay experiment.

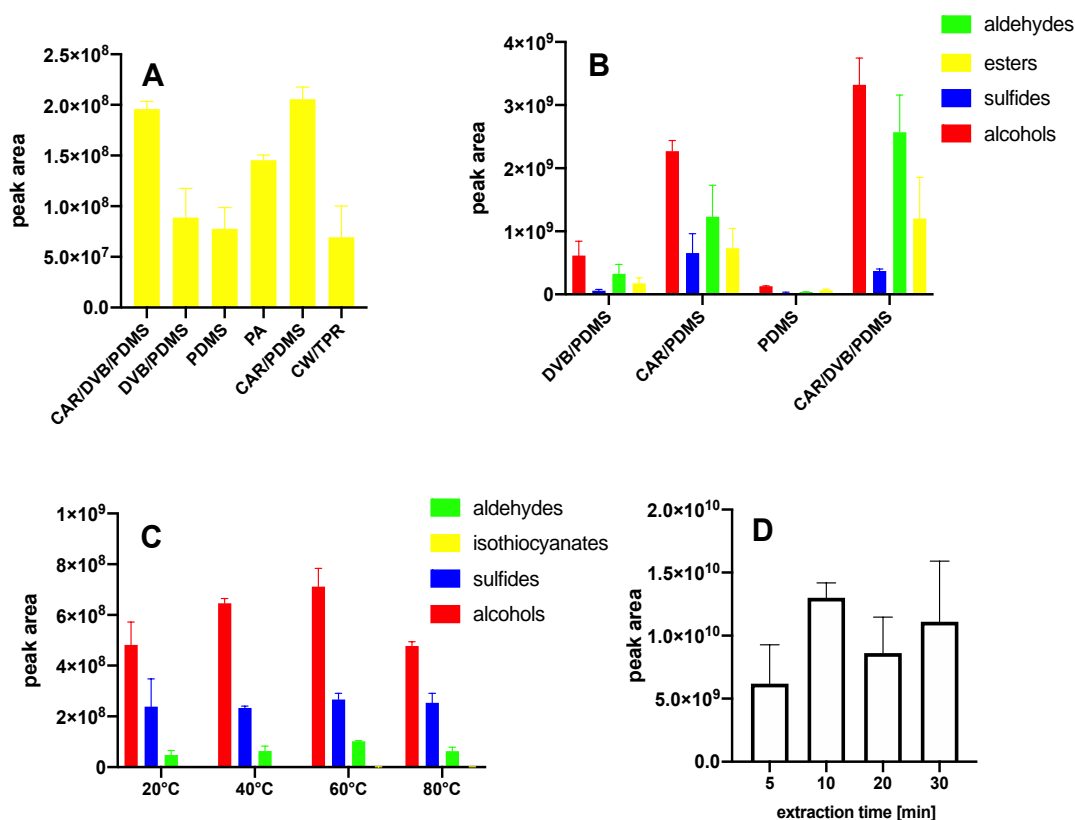

**Figure S5.** SPME extraction parameters investigated for sampling of broccoli volatiles. A) – fiber effectiveness in extraction of isothiocyanates from standards solution; B) – fiber effectiveness in extraction of volatiles from broccoli; C) – influence of extraction temperature on the amount of volatiles isolated from broccoli; D) – influence of extraction time on the amount of volatiles isolated from broccoli.



**Table S2.** The mean values and standard deviations of the measured geometric parameters for all sample treatment methods for imaging from the parenchymatic tissue area.

|                             |               | Cells   |          | All objects |          |
|-----------------------------|---------------|---------|----------|-------------|----------|
|                             |               | Avg.    | Std.dev. | Avg.        | Std.dev. |
| Area ( $\mu\text{m}^2$ )    | Control       | 1580,00 | 717,10   | 1573,64     | 793,00   |
|                             | Fast freezing | 1619,00 | 689,61   | 1742,00     | 968,71   |
|                             | Slow freezing | 1567,29 | 865,65   | 1911,73     | 2904,18  |
| Perimeter ( $\mu\text{m}$ ) | Control       | 162,99  | 39,44    | 163,77      | 45,37    |
|                             | Fast freezing | 168,81  | 37,57    | 174,46      | 54,28    |
|                             | Slow freezing | 165,43  | 49,95    | 182,98      | 108,60   |
| Elongation (a.u.)           | Control       | 1,43    | 0,30     | 1,46        | 0,32     |
|                             | Fast freezing | 1,42    | 0,28     | 1,46        | 0,32     |
|                             | Slow freezing | 1,52    | 0,38     | 1,57        | 0,44     |
| Circularity (a.u.)          | Control       | 0,71    | 0,07     | 0,70        | 0,08     |
|                             | Fast freezing | 0,71    | 0,07     | 0,69        | 0,09     |
|                             | Slow freezing | 0,68    | 0,09     | 0,65        | 0,11     |

**Table S3.** The mean values and standard deviations of the measured geometric parameters for all sample treatment methods for imaging from the epidermal tissue area.

|                             |               | Cells  |          | All objects |          |
|-----------------------------|---------------|--------|----------|-------------|----------|
|                             |               | Avg.   | Std.dev. | Avg.        | Std.dev. |
| Area ( $\mu\text{m}^2$ )    | Control       | 373,01 | 239,36   | 376,47      | 246,92   |
|                             | Fast freezing | 370,63 | 243,90   | 362,04      | 250,44   |
|                             | Slow freezing | 475,96 | 296,05   | 522,53      | 470,66   |
| Perimeter ( $\mu\text{m}$ ) | Control       | 75,28  | 25,57    | 76,34       | 27,10    |
|                             | Fast freezing | 75,26  | 25,87    | 75,31       | 27,69    |
|                             | Slow freezing | 87,36  | 29,68    | 95,42       | 55,30    |
| Elongation (a.u.)           | Control       | 1,40   | 0,32     | 1,44        | 0,38     |
|                             | Fast freezing | 1,42   | 0,33     | 1,48        | 0,41     |
|                             | Slow freezing | 1,47   | 0,39     | 1,60        | 0,73     |
| Circularity (a.u.)          | Control       | 0,76   | 0,09     | 0,75        | 0,10     |
|                             | Fast freezing | 0,75   | 0,10     | 0,74        | 0,12     |
|                             | Slow freezing | 0,73   | 0,10     | 0,70        | 0,14     |

**Table S4.** Influence freezing-thawing of broccoli florets on extracted volatiles. Values for  $p < 0.05$  are considered significant difference

|             | peak area ± standard deviation |                 | <i>p</i> -value |
|-------------|--------------------------------|-----------------|-----------------|
|             | fresh                          | frozen-thawed   |                 |
| alcohols    | 6E+08 ± 1E+07                  | 2,9E+08 ± 7E+07 | <b>0,00005</b>  |
| aldehydes   | 5E+07 ± 8E+06                  | 1,9E+08 ± 4E+07 | <b>0,178</b>    |
| tiocyanates | 3E+08 ± 7E+07                  | 8,9E+07 ± 5E+06 | <b>0,021</b>    |
| nitriles    | 2E+06 ± 8E+05                  | 1,6E+08 ± 4E+07 | <b>0,0026</b>   |

**Table S5.** Influence of broccoli florets preparation on the amount of extracted volatiles by SPME. Values for  $p < 0.05$  are considered significant difference

|                 | peak area ± standard deviation |         |          |         |           |         |       |
|-----------------|--------------------------------|---------|----------|---------|-----------|---------|-------|
|                 | cutting                        |         | blending |         | shredding |         |       |
| alcohols        | 1E+08                          | ± 2E+07 | 4E+08    | ± 7E+06 | 3E+08     | ± 2E+07 | 0,003 |
| isothiocyanates | 9E+06                          | ± 1E+06 | 3E+08    | ± 7E+07 | 1E+08     | ± 2E+07 | 0,02  |
| sulfides        | 1E+08                          | ± 2E+07 | 2E+08    | ± 3E+07 | 2E+08     | ± 2E+07 | 0,25  |
| aldehydes       | 5E+06                          | ± 1E+06 | 5E+07    | ± 9E+06 | 2E+07     | 2E+06   | 0,002 |

**Table S6** Statistical results for the comparison of sample pairs (from Tab.S3) using Tukey's Multiple Comparison Test. The table reports *p* value. Values for  $p < 0.05$  are considered significant difference

| sample pairs       | alcohols | isothiocyanates | sulfides | aldehydes |
|--------------------|----------|-----------------|----------|-----------|
| cutting-blending   | 0.00016  | 0.00081         | -        | 0.000095  |
| shredding-blending | 0.007    | 0.005           | -        | 0.0006    |
| shredding-cutting  | 0.006    | 0.153           | -        | 0.06      |

“-“  $p$  value  $> 0.05$  according to Tab.S3.

**Table S7** Influence of enzymatic reactions quenching in broccoli florets on extracted volatiles. Values for  $p < 0.05$  are considered significant difference

|                | LN                      | EDTA                    | cooking                 | no action               | <i>p</i> -value |
|----------------|-------------------------|-------------------------|-------------------------|-------------------------|-----------------|
| sulfur         | 3,00E+07 $\pm$ 3,00E+06 | 7,00E+06 $\pm$ 2,00E+06 | 6,00E+07 $\pm$ 3,00E+06 | 3,00E+08 $\pm$ 2,00E+07 | <b>0.005</b>    |
| aldehydes      | 2,00E+08 $\pm$ 1,00E+07 | 3,00E+08 $\pm$ 3,00E+06 | 3,00E+06 $\pm$ 1,00E+05 | 9,00E+06 $\pm$ 2,00E+06 | <b>0.0009</b>   |
| alcohols       | 1,00E+08 $\pm$ 7,00E+05 | 1,00E+08 $\pm$ 856889   | 4,00E+05 $\pm$ 38383    | 3,00E+08 $\pm$ 891235   | <b>0.0001</b>   |
| ITC            | 1,00E+07 $\pm$ 2,00E+06 | 6,00E+06 $\pm$ 747805   | 6321 $\pm$ 3449         | 1,00E+07 $\pm$ 5,00E+06 | <b>0.045</b>    |
| furan, 2-ethyl | 1,00E+08 $\pm$ 1,00E+06 | 4,00E+07 $\pm$ 3,00E+06 | 3,00E+05 $\pm$ 45410    | 4,00E+06 $\pm$ 172172   | <b>0.0004</b>   |

**Table S8.** Statistical results for the comparison of sample pairs (from Tab.S5) using Tukey's Multiple Comparison Test. The table reports *p* value. Values for  $p < 0.05$  are considered significant difference

| sample pairs        | sulfides | aldehydes | alcohols | isothiocyanates | furan, 2-ethyl |
|---------------------|----------|-----------|----------|-----------------|----------------|
| no action - LN      | 0.00008  | 0.000097  | 1E-10    | 0.58            | 0              |
| cooking - LN        | 0.14     | 0.000086  | 1E-10    | 0.047           | 0              |
| EDTA - LN           | 0.23     | 0.0008    | 0.007    | 0.32            | 0              |
| cooking - no action | 0.0001   | 0.8       | 1E-10    | 0.028           | 0.29           |
| EDTA - no action    | 0.00006  | 0.00001   | 1E-10    | 0.093           | 0.0001         |
| EDTA - cooking      | 0.02     | 0.00001   | 1E-10    | 0.27            | 0.00008        |
